# Supplementary material
Source: publisher site journal article supplement (https://www.dovepress.com/article/576056)
Supplement: Supplementary file 1 [file 576056%20Revised%20Supplementary%20table.docx]

**Supplementary materials**

**Supplementary Table S1. Clinical characteristics of patients whose *Acinetobacter* isolates were used in this study.**

| **Parameters** | | **TotalIsolates**  **(N = 40)** | |
| --- | --- | --- | --- |
| Age (years), average (min-max) | |  | 57.8 (18-87) |
| Number of females, n (%) | |  | 21 (52.5) |
| Clinical manifestation, n (%) | |  |  |
|  | Pneumonia |  | 36 (90) |
|  | Bacteremia |  | 3 (7.5) |
|  | Urinary tract infection |  | 1 (2.5) |
| ICU admission, n (%) | |  | 15 (37.5) |
| Mortality, n (%) | |  | 13 (32.5) |
| Antimicrobial resistance, n (%) | |  |  |
|  | Non-MDR |  | 19 (47.5) |
|  | MDR |  | 4 (10) |
|  | CRAB |  | 17 (42.5) |

ICU; intensive care unit, MDR; multi-drug resistance, CRAB; Carbapenem-resistant *Acinetobacter baumannii*
